# Supplementary material for: A multi-responsive chemosensor for highly sensitive and selective detection of Fe3+, Cu2+, Cr2O72− and nitrobenzene based on a luminescent lanthanide metal–organic framework
Source: Royal Society of Chemistry journal article supplement (doi:10.1039/d0dt02120b), 2020-01-01
Supplement: d0dt02120b1.pdf [file d0dt02120b1.pdf]

# Multi-responsive Chemosensors for Highly Sensitive and Selective Detection of Fe<sup>3+</sup>, Cu<sup>2+</sup>, Cr<sub>2</sub>O<sub>7</sub><sup>2-</sup> and Nitrobenzene based on Luminescent Lanthanide Metal–Organic Frameworks

Yi Du,<sup>a</sup> Huayong Yang,<sup>a</sup> Ruijuan Liu,<sup>a</sup> Caiyun Shao,<sup>a</sup> Lirong Yang<sup>a,\*</sup>

<sup>a</sup>Henan Key Laboratory of Polyoxometalate Chemistry, College of Chemistry and Chemical Engineering, Henan University, Kaifeng, Henan 475004, P. R. China

## Electronic Supplementary Information

**Table S1** Selected bond lengths and bond angles for I–VI.

**Table S2** Distances and angles of hydrogen bonds.

**Table S3** Comparison of the corresponding lengths (Å, (average)) for I–VI.

**Table S4** The ICP-AES data after 12 h of soaking in Fe<sup>3+</sup> and Cu<sup>2+</sup> ions.

**Fig. S1** TGA curve of compound I–VI.

**Fig. S2** PXRD patterns of compounds I–VI.

**Fig. S3** The PXRD of I–V soaked into aqueous solutions with different pH values.

**Fig. S4** (a) The excitation spectrum ( $\lambda_{em} = 420$  nm) (black) and the emission spectra of H<sub>4</sub>dpc, ( $\lambda_{ex} = 339$  nm) (blue) of H<sub>4</sub>dpc recorded at 298 K. (b) Luminescence decay of H<sub>4</sub>dpc ligand.

**Fig. S5** Luminescence decay of Eu-MOF.

**Fig. S6** Solid-state luminescent spectrum of I–VI.

**Fig. S7** The PXRD of Eu-MOF: as-synthesized and immersed in different cations solution.

**Fig. S8** Comparison of the luminescence intensity (<sup>5</sup>D<sub>0</sub>→<sup>7</sup>F<sub>2</sub>) of Eu-MOF in sensing Fe<sup>3+</sup> (a) and Cu<sup>2+</sup> (c) with the interference of different cations solvents, red and blue bars represent the before and after the addition of Fe<sup>3+</sup> (a) and Cu<sup>2+</sup> (c), respectively. Quenching and recovery tests of Eu-MOF for Fe<sup>3+</sup> (b) and Cu<sup>2+</sup> (d) in DMF.

**Fig. S9** The UV-vis adsorption spectra of various cations.

**Fig. S10** (a) Comparison of the luminescence intensity (<sup>5</sup>D<sub>0</sub>→<sup>7</sup>F<sub>2</sub>) of Eu-MOF in sensing Cr<sub>2</sub>O<sub>7</sub><sup>2-</sup> with the interference of different anions solvents, red and blue bars represent the before and after the addition of Cr<sub>2</sub>O<sub>7</sub><sup>2-</sup>. (b) quenching and recovery tests of Eu-MOF for Cr<sub>2</sub>O<sub>7</sub><sup>2-</sup> in DMF.

**Fig. S11** The PXRD of Eu-MOF: as-synthesized and immersed in different anions solution.

**Fig. S12** The UV-vis adsorption spectra of various anions.

**Table S1** Selected bond lengths and bond angles for I–VI.

| Bond lengths (Å) |            |         |            |         |          |
|------------------|------------|---------|------------|---------|----------|
| <b>I</b>         |            |         |            |         |          |
| La1-O7           | 2.405(4)   | La1-O4  | 2.468(4)   | La1-O9  | 2.550(5) |
| La1-O1           | 2.579(4)   | La1-O2a | 2.597(4)   | La1-O2W | 2.601(5) |
| La1-O2           | 2.620(4)   | La1-O1W | 2.633(5)   | La1-O8  | 2.657(4) |
| <b>II</b>        |            |         |            |         |          |
| Ce1-O9           | 2.3724(19) | Ce1-O1  | 2.4358(19) | Ce1-O7  | 2.512(2) |

|                |            |             |            |             |            |
|----------------|------------|-------------|------------|-------------|------------|
| Ce1-O4         | 2.5450(19) | Ce1-O1W     | 2.575(2)   | Ce1-O3      | 2.5760(18) |
| Ce1-O2W        | 2.602(2)   | Ce1-O3a     | 2.6043(18) | Ce1-O6      | 2.6322(19) |
| <b>III</b>     |            |             |            |             |            |
| Pr1-O8         | 2.3324(17) | Pr1-O2      | 2.3986(17) | Pr1-O6      | 2.4755(18) |
| Pr1-O5         | 2.5075(17) | Pr1-O4a     | 2.5317(17) | Pr1-O2W     | 2.5314(19) |
| Pr1-O1W        | 2.563(2)   | Pr1-O4      | 2.5731(16) | Pr1-O7      | 2.6024(18) |
| <b>IV</b>      |            |             |            |             |            |
| Nd1-O5         | 2.3469(18) | Nd1-O9      | 2.4041(17) | Nd1-O1      | 2.4809(18) |
| Nd1-O6         | 2.5099(17) | Nd1-O1W     | 2.5321(19) | Nd1-O7a     | 2.5427(16) |
| Nd1-O2W        | 2.5648(19) | Nd1-O7      | 2.5888(17) | Nd1-O2      | 2.6109(17) |
| <b>V</b>       |            |             |            |             |            |
| Sm1-O5         | 2.316(2)   | Sm1-O8      | 2.373(2)   | Sm1-O1      | 2.450(2)   |
| Sm1-O7         | 2.484(2)   | Sm1-O2W     | 2.510(2)   | Sm1-O6a     | 2.515(2)   |
| Sm1-O1W        | 2.533(3)   | Sm1-O6      | 2.586(2)   | Sm1-O2      | 2.604(2)   |
| <b>VI</b>      |            |             |            |             |            |
| Eu1-O1         | 2.293(6)   | Eu1-O9      | 2.355(5)   | Eu1-O5      | 2.437(6)   |
| Eu1-O7         | 2.463(6)   | Eu1-O2W     | 2.487(6)   | Eu1-O6a     | 2.497(5)   |
| Eu1-O1W        | 2.518(6)   | Eu1-O6      | 2.576(6)   | Eu1-O4      | 2.576(6)   |
| Bond angle (°) |            |             |            |             |            |
| <b>I</b>       |            |             |            |             |            |
| O7-La1-O4      | 82.38(15)  | O7-La1-O9   | 129.57(15) | O4-La1-O9   | 87.98 (15) |
| O7-La1-O1      | 82.67 (14) | O4-La1-O1   | 140.30(15) | O9-La1-O1   | 129.07(15) |
| O7-La1-O2a     | 133.03(14) | O4-La1-O2a  | 135.95(13) | O9-La1-O2a  | 85.36(14)  |
| O1-La1-O2a     | 50.76(13)  | O7-La1-O2W  | 87.26(16)  | O4-La1-O2W  | 75.75(15)  |
| O9-La1-O2W     | 137.65(15) | O1-La1-O2W  | 66.98(15)  | O2-La1-O2W  | 80.40(14)  |
| O7-La1-O2      | 145.64(15) | O4-La1-O2   | 68.58(13)  | O9-La1-O2   | 69.13(14)  |
| O1-La1-O2      | 107.90(13) | O2-La1-O2a  | 68.38(14)  | O2W-La1-O2a | 68.54(14)  |
| O7-La1-O1W     | 90.49(16)  | O4-La1-O1W  | 145.50(15) | O9-La1-O1W  | 70.77(15)  |
| O1-La1-O1W     | 70.98(15)  | O2a-La1-O1W | 70.78(14)  | O2W-La1-O1W | 137.85(15) |
| O2-La1-O1W     | 123.85(14) | O7-La1-O8   | 79.55(14)  | O4-La1-O8a  | 72.90(15)  |
| O9-La1-O8      | 50.45 (14) | O1-La1-O8   | 139.07(15) | O2-La1-O8   | 129.83(14) |
| O2W-La1-O8     | 147.26(15) | O2a-La1-O8  | 107.55(13) | O1W-La1-O8  | 72.61(14)  |
| <b>II</b>      |            |             |            |             |            |
| O9-Ce1-O1      | 82.45(7)   | O9-Ce1-O7   | 129.42(7)  | O1-Ce1-O7   | 87.99(7)   |
| O9-Ce1-O4      | 82.37(6)   | O1-Ce1-O4   | 140.48(7)  | O7-Ce1-O4   | 129.08(7)  |
| O9-Ce1-O1W     | 86.57(8)   | O1-Ce1-O1W  | 75.78(7)   | O7-Ce1-O1W  | 138.49(7)  |
| O4-Ce1-O1W     | 67.08(7)   | O9-Ce1-O3   | 145.89(7)  | O1-Ce1-O3   | 68.93(6)   |
| O7-Ce1-O3      | 69.42(6)   | O4-Ce1-O3   | 107.90(6)  | O1W-Ce1-O3  | 69.10 (7)  |
| O9-Ce1-O2W     | 90.14(8)   | O1-Ce1-O2W  | 145.68(7)  | O7-Ce1-O2W  | 71.06(7)   |
| O4-Ce1-O2W     | 70.41(7)   | O1W-Ce1-O2W | 137.42(7)  | O3-Ce1-O2W  | 70.20(7)   |
| O9-Ce1-O3      | 132.82(6)  | O1-Ce1-O3   | 136.48(6)  | O7-Ce1-O3   | 85.22(6)   |
| O4-Ce1-O3      | 50.92(6)   | O1W-Ce1-O3  | 81.36(7)   | O3-Ce1-O3a  | 68.45(7)   |
| O2W-Ce1-O3     | 123.97(7)  | O9-Ce1-O6   | 79.11(6)   | O1-Ce1-O6   | 72.53(7)   |
| O7-Ce1-O6      | 50.80(6)   | O4-Ce1-O6   | 138.80(7)  | O1W-Ce1-O6  | 146.58(7)  |

|            |           |             |           |             |           |
|------------|-----------|-------------|-----------|-------------|-----------|
| O3-Ce1-O6  | 129.92(6) | O2W-Ce1-O6  | 73.16(7)  | O3-Ce1-O6   | 108.06(6) |
| <b>III</b> |           |             |           |             |           |
| O8-Pr1-O2  | 82.69(6)  | O8-Pr1-O6   | 129.64(6) | O2-Pr1-O6   | 87.85(6)  |
| O8-Pr1-O5  | 81.75(6)  | O2-Pr1-O5   | 140.53(6) | O6-Pr1-O5   | 129.31(7) |
| O8-Pr1-O4  | 132.44(6) | O2-Pr1-O4   | 136.70(5) | O6-Pr1-O4   | 85.23(6)  |
| O5-Pr1-O4  | 51.17(5)  | O8-Pr1-O2W  | 86.39(7)  | O2-Pr1-O2W  | 75.91(6)  |
| O6-Pr1-O2W | 138.52(6) | O5-Pr1-O2W  | 67.11(6)  | O4-Pr1-O2W  | 81.49(7)  |
| O8-Pr1-O1W | 89.75(7)  | O2-Pr1-O1W  | 145.33(6) | O6-Pr1-O1W  | 71.19(6)  |
| O5-Pr1-O1W | 70.48(6)  | O4-Pr1-O1W  | 70.37(6)  | O2W-Pr1-O1W | 137.53(6) |
| O8-Pr1-O4  | 146.06(6) | O2-Pr1-O4   | 69.09(6)  | O6-Pr1-O4   | 69.42(6)  |
| O5-Pr1-O4  | 108.08(5) | O4-Pr1-O4a  | 68.47(6)  | O2W-Pr1-O4  | 69.14(6)  |
| O1W-Pr1-O4 | 124.19(6) | O8-Pr1-O7   | 79.13(6)  | O2-Pr1-O7   | 72.49(6)  |
| O6-Pr1-O7  | 51.00(6)  | O5-Pr1-O7   | 138.42(6) | O4-Pr1-O7   | 129.94(5) |
| O2W-Pr1-O7 | 146.58(6) | O1W-Pr1-O7  | 72.86(6)  | O4-Pr1-O7a  | 108.39(5) |
| <b>IV</b>  |           |             |           |             |           |
| O5-Nd1-O9  | 82.83(6)  | O5-Nd1-O1   | 129.75(6) | O9-Nd1-O1   | 87.92(7)  |
| O5-Nd1-O6  | 81.45(6)  | O9-Nd1-O6   | 140.44(6) | O1-Nd1-O6   | 129.38(6) |
| O5-Nd1-O1W | 86.20(7)  | O9-Nd1-O1W  | 75.73(6)  | O1-Nd1-O1W  | 138.60(7) |
| O6-Nd1-O1W | 67.20(6)  | O5-Nd1-O7   | 132.54(6) | O9-Nd1-O7   | 136.58(6) |
| O1-Nd1-O7  | 84.91(6)  | O6-Nd1-O7   | 51.59(5)  | O1W-Nd1-O7  | 81.87(6)  |
| O5-Nd1-O2W | 89.35(7)  | O9-Nd1-O2W  | 145.13(6) | O1-Nd1-O2W  | 71.26(7)  |
| O6-Nd1-O2W | 70.61(6)  | O1W-Nd1-O2W | 137.77(6) | O7-Nd1-O2W  | 70.68(6)  |
| O5-Nd1-O7  | 146.24(6) | O9-Nd1-O7   | 69.22(6)  | O1-Nd1-O7   | 69.43(6)  |
| O6-Nd1-O7  | 108.07(5) | O1W-Nd1-O7  | 69.23(6)  | O7-Nd1-O7a  | 68.17(6)  |
| O2W-Nd1-O7 | 124.41(6) | O5-Nd1-O2   | 78.90(6)  | O9-Nd1-O2   | 72.57(6)  |
| O1-Nd1-O2  | 51.35(6)  | O6-Nd1-O2   | 138.15(6) | O1W-Nd1-O2  | 146.32(6) |
| O7-Nd1-O2  | 129.91(6) | O2W-Nd1-O2  | 72.58(6)  | O7-Nd1-O2   | 108.79(5) |
| <b>V</b>   |           |             |           |             |           |
| O5-Sm1-O8  | 82.82(8)  | O5-Sm1-O1   | 130.17(8) | O8-Sm1-O1   | 87.31(8)  |
| O5-Sm1-O7  | 80.83(8)  | O8-Sm1-O7   | 140.85(8) | O1-Sm1-O7   | 129.78(8) |
| O5-Sm1-O2W | 85.55(9)  | O8-Sm1-O2W  | 75.72(8)  | O1-Sm1-O2W  | 138.46(9) |
| O7-Sm1-O2W | 67.75(8)  | O5-Sm1-O6   | 132.60(7) | O8-Sm1-O6   | 136.88(7) |
| O1-Sm1-O6  | 84.64(8)  | O7-Sm1-O6   | 52.25(7)  | O2W-Sm1-O6  | 82.78(9)  |
| O5-Sm1-O1W | 89.04(9)  | O8-Sm1-O1W  | 144.40(8) | O1-Sm1-O1W  | 71.77(9)  |
| O7-Sm1-O1W | 70.55(8)  | O2W-Sm1-O1W | 138.29(8) | O6-Sm1-O1W  | 70.93(9)  |
| O5-Sm1-O6  | 146.15(8) | O8-Sm1-O6   | 69.62(7)  | O1-Sm1-O6   | 69.34(8)  |
| O7-Sm1-O6  | 108.23(7) | O2W-Sm1-O6  | 69.23(8)  | O6-Sm1-O6a  | 67.90(8)  |
| O1W-Sm1-O6 | 124.80(8) | O5-Sm1-O2   | 78.88(8)  | O8-Sm1-O2   | 72.13(8)  |
| O1-Sm1-O2  | 51.73(8)  | O7-Sm1-O2   | 137.62(9) | O2W-Sm1-O2  | 145.66(9) |
| O6-Sm1-O2  | 129.76(7) | O1W-Sm1-O2  | 72.30(8)  | O6-Sm1-O2   | 109.35(7) |
| <b>VI</b>  |           |             |           |             |           |
| O1-Eu1-O9  | 83.3(2)   | O1-Eu1-O5   | 130.3(2)  | O9-Eu1-O5   | 87.0(2)   |
| O1-Eu1-O7  | 80.68(19) | O9-Eu1-O7   | 141.2(2)  | O5-Eu1-O7   | 129.7(2)  |
| O1-Eu1-O2W | 85.4(2)   | O9-Eu1-O2W  | 75.9(2)   | O5-Eu1-O2W  | 138.5(3)  |

|            |            |             |            |            |            |
|------------|------------|-------------|------------|------------|------------|
| O7-Eu1-O2W | 67.9(2)    | O1-Eu1-O6   | 146.0(2)   | O9-Eu1-O6  | 69.63(18)  |
| O5-Eu1-O6  | 69.85(19)  | O7-Eu1-O6   | 107.76(19) | O2W-Eu1-O6 | 68.79(19)  |
| O1-Eu1-O1W | 88.3(2)    | O9-Eu1-O1W  | 143.5(2)   | O5-Eu1-O1W | 71.8(2)    |
| O7-Eu1-O1W | 70.9(2)    | O2W-Eu1-O1W | 138.8(2)   | O6-Eu1-O1W | 71.86(19)  |
| O1-Eu1-O6  | 132.75(19) | O9-Eu1-O6   | 136.60(18) | O5-Eu1-O6  | 84.3(2)    |
| O7-Eu1-O6  | 52.55(18)  | O2W-Eu1-O6  | 83.1(2)    | O6-Eu1-O6a | 67.4(2)    |
| O1W-Eu1-O6 | 125.72(19) | O1-Eu1-O4   | 79.03(19)  | O9-Eu1-O4  | 71.85(19)  |
| O5-Eu1-O4  | 51.76(19)  | O7-Eu1-O4   | 137.7(2)   | O2W-Eu1-O4 | 145.5(2)   |
| O6-Eu1-O4  | 129.60(19) | O1W-Eu1-O4  | 71.69(19)  | O6-Eu1-O4  | 129.60(19) |

**Table S2** Distances and angles of hydrogen bonds.

| D  | H  | A  | d(D-H) | d(H...A) | d(D...A)  | ∠(D-H...A) |
|----|----|----|--------|----------|-----------|------------|
| C2 | H2 | O2 | 0.93   | 2.52     | 3.400(12) | 158        |
| C2 | H2 | O3 | 0.93   | 2.58     | 3.094(12) | 115        |

**Table S3** Comparison of the corresponding lengths (Å, (average)) for I-VI.

|                          | I          | II        | III        | IV        | V         | VI         |
|--------------------------|------------|-----------|------------|-----------|-----------|------------|
| Ln-OW                    | 2.617      | 2.589     | 2.547      | 2.548     | 2.522     | 2.503      |
| Ln-O <sub>carboxyl</sub> | 2.554      | 2.525     | 2.484      | 2.498     | 2.475     | 2.457      |
| Ln...Ln                  | 4.3159(20) | 4.2833(5) | 4.2204(13) | 4.2500(6) | 4.2322(5) | 4.2202(10) |

**Remark:** OW, oxygen atom of the coordinated water; O<sub>carboxyl</sub>, oxygen atom of the carboxylic group, Ln-O<sub>carboxyl</sub>, average length.

**Table S4** The ICP-AES data after 12 h of soaking in Fe<sup>3+</sup> and Cu<sup>2+</sup> ions.

| Ions             | The initial concentration<br>(mg/L) | Residual ion concentration in solution<br>(mg/L) | Adsorption percentage<br>(%) |
|------------------|-------------------------------------|--------------------------------------------------|------------------------------|
| Fe <sup>3+</sup> | 5.585                               | 2.858                                            | 48.83                        |
| Cu <sup>2+</sup> | 6.355                               | 6.250                                            | 16.52                        |

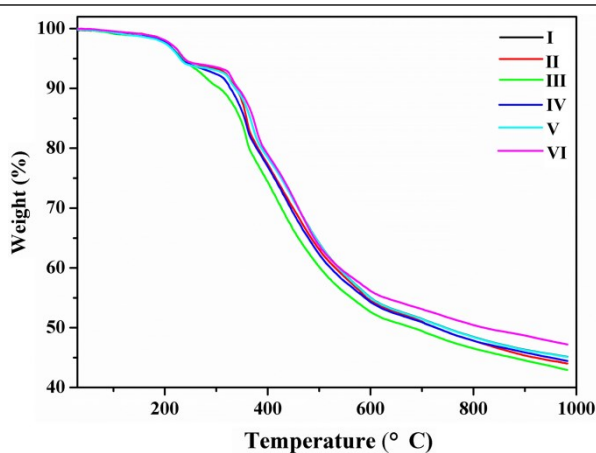

**Fig. S1** TGA curve of compound I-VI.

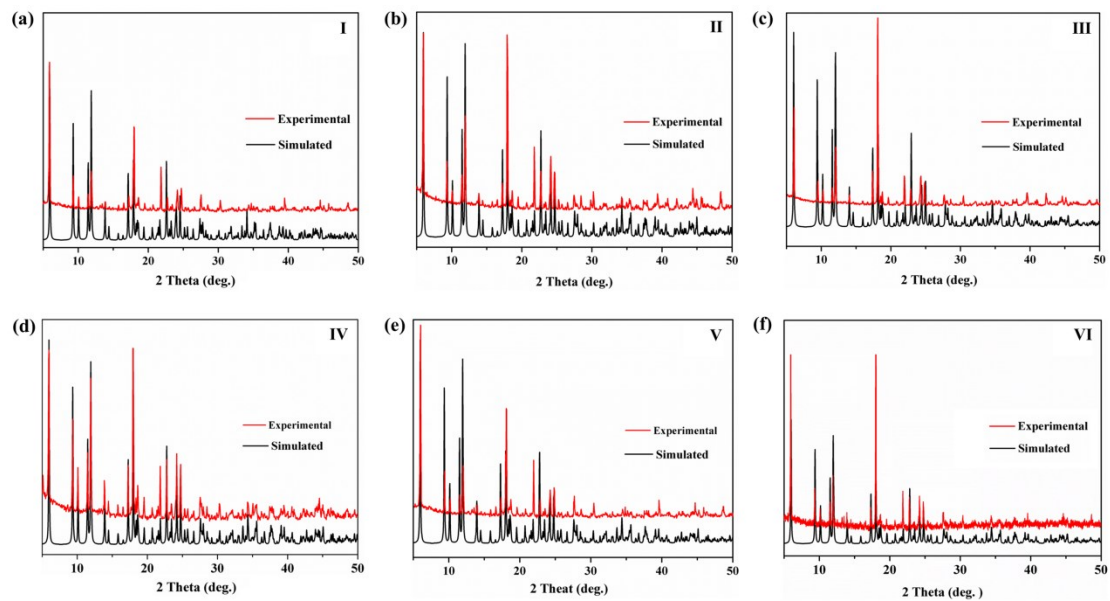

Fig. S2 PXRD patterns of compounds I-VI.

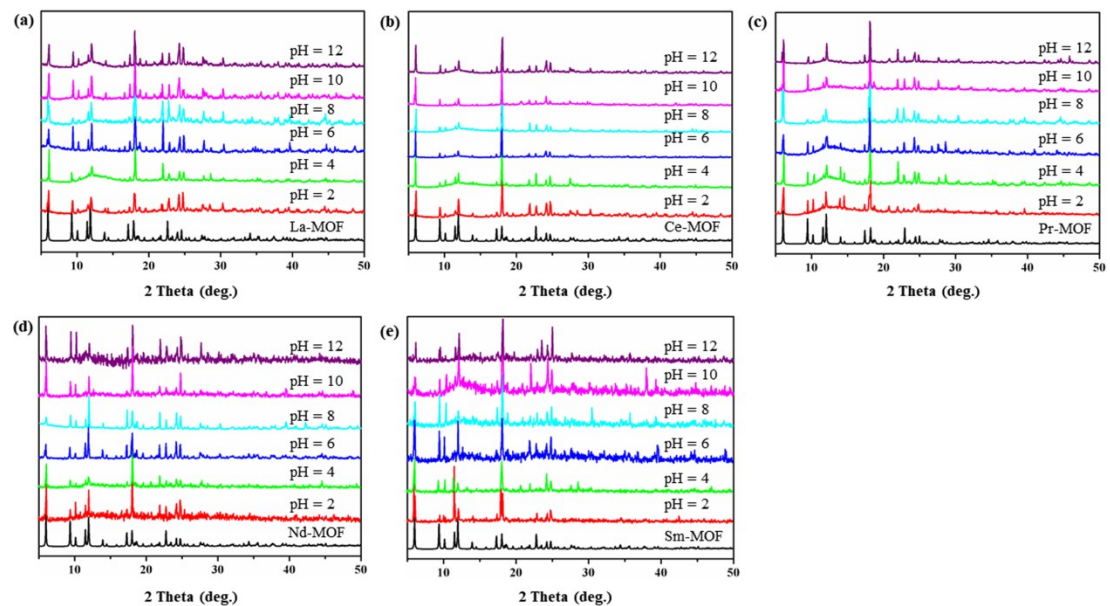

Fig. S3 The PXRD of I-V soaked into aqueous solutions with different pH values.

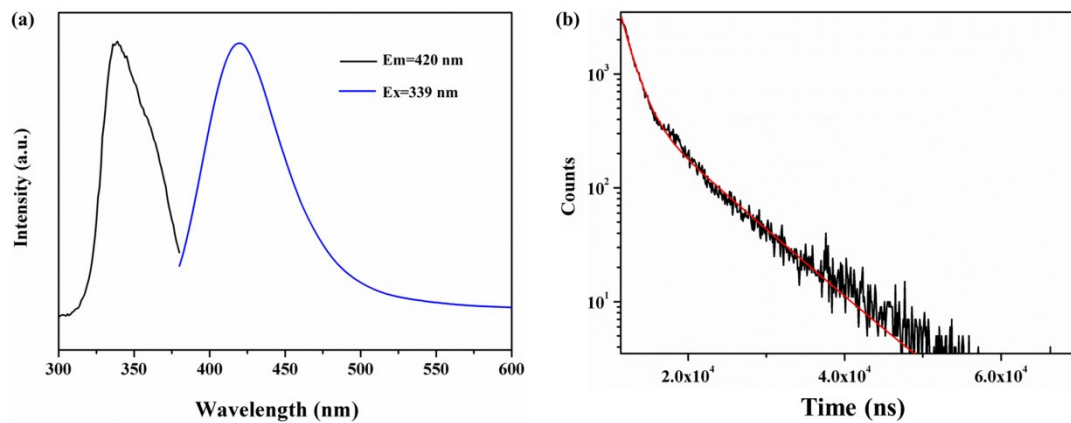

Fig. S4 (a) The excitation spectrum ( $\lambda_{em} = 420$  nm) (black) and the emission spectra of  $H_4dpc$ , ( $\lambda_{ex} = 339$  nm) (blue)

of H<sub>4</sub>dpc recorded at 298 K. (b) Luminescence decay of H<sub>4</sub>dpc ligand.

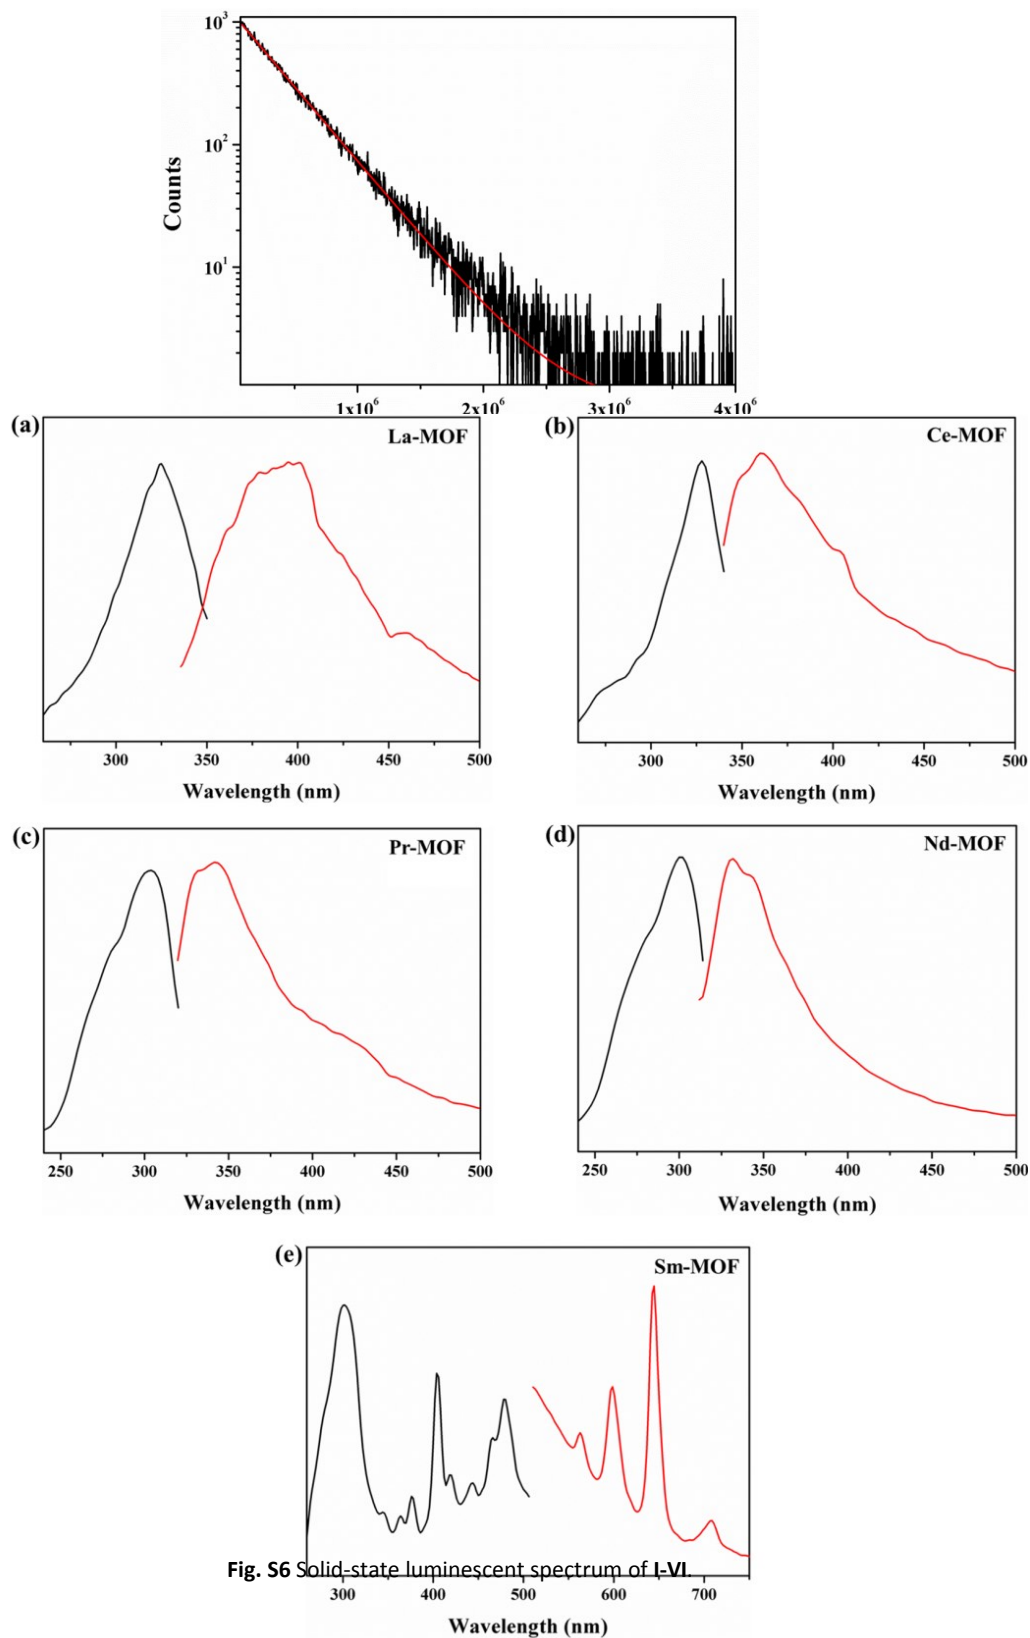

Fig. S6 Solid-state luminescent spectrum of I-VI

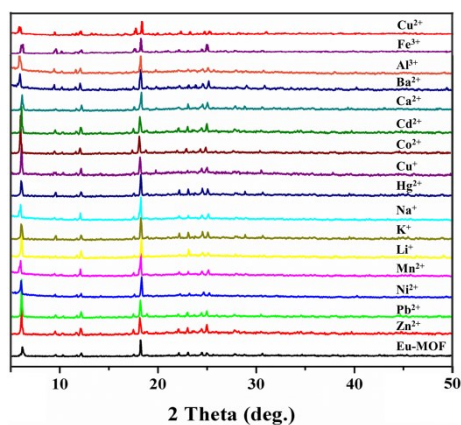

Fig. S7 The PXRD of Eu-MOF: as-synthesized and immersed in different cations solution.

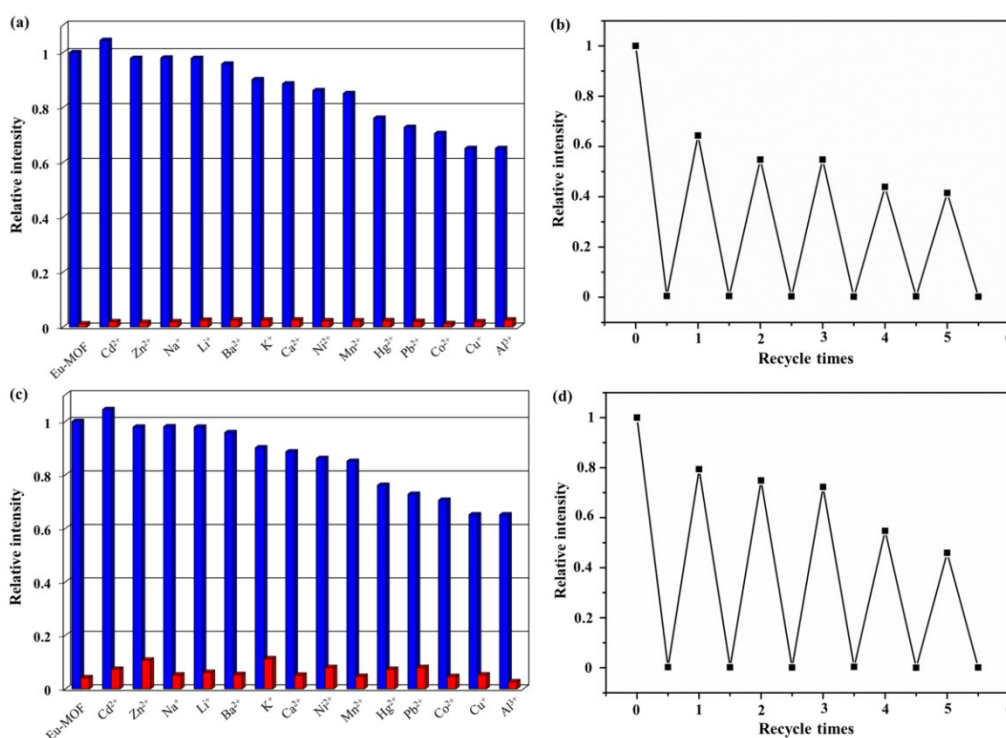

Fig. S8 Comparison of the luminescence intensity ( ${}^5D_0 \rightarrow {}^7F_2$ ) of Eu-MOF in sensing Fe<sup>3+</sup> (a) and Cu<sup>2+</sup> (c) with the interference of different cations solvents, red and blue bars represent the before and after the addition of Fe<sup>3+</sup> (a) and Cu<sup>2+</sup> (c), respectively. Quenching and recovery tests of Eu-MOF for Fe<sup>3+</sup> (b) and Cu<sup>2+</sup> (d) in DMF.

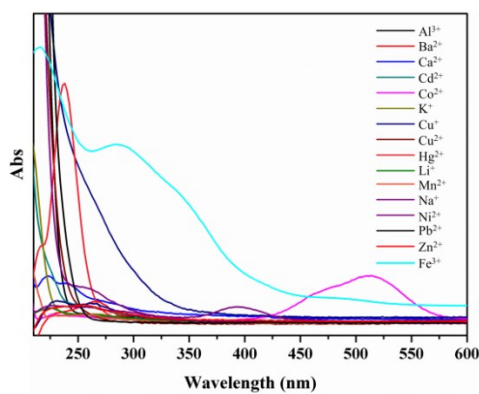

Fig. S9 The UV-vis adsorption spectra of various cations.

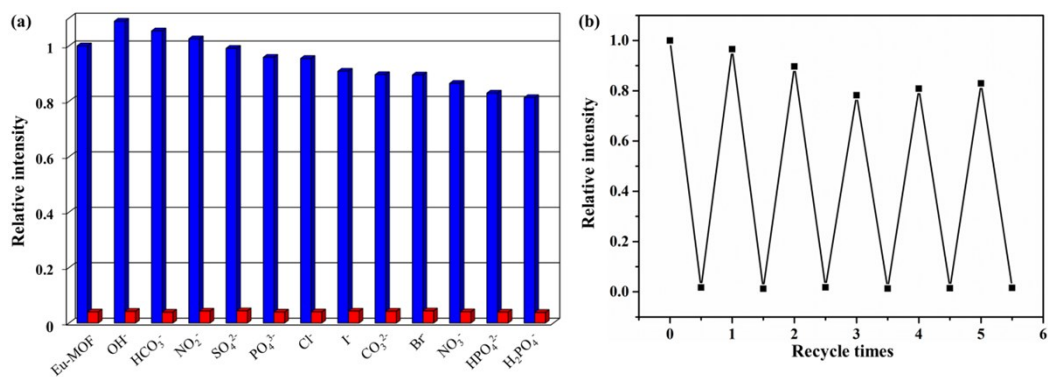

**Fig. S10** (a) Comparison of the luminescence intensity ( $^5\text{D}_0 \rightarrow ^7\text{F}_2$ ) of Eu-MOF in sensing  $\text{Cr}_2\text{O}_7^{2-}$  with the interference of different anions solvents, red and blue bars represent the before and after the addition of  $\text{Cr}_2\text{O}_7^{2-}$ . (b) quenching and recovery tests of Eu-MOF for  $\text{Cr}_2\text{O}_7^{2-}$  in DMF.

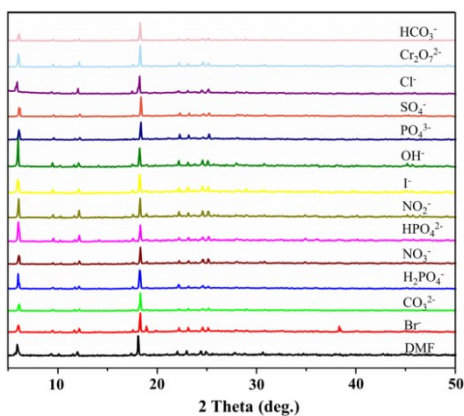

**Fig. S11** The PXRD of Eu-MOF: as-synthesized and immersed in different anions solution.

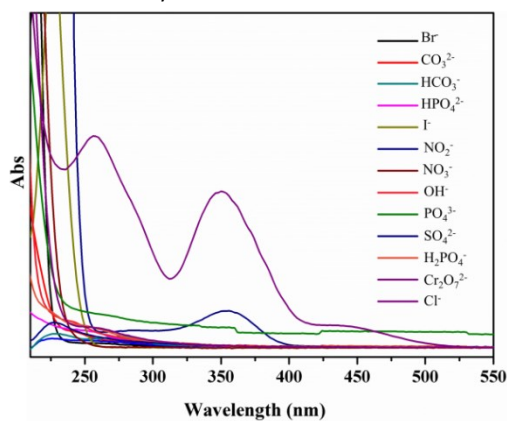

**Fig. S12** The UV-vis adsorption spectra of various anions.
